# Supplementary material
Source: MDPI journal article supplement (https://www.mdpi.com/1996-1073/12/3/420)
Supplement: s1 [file s1]

# Opportunities to Optimize the Palm Oil Supply Chain in Sumatra, Indonesia

Fumi Harahap <sup>1,2,\*</sup>, Sylvain Leduc <sup>2</sup>, Sennai Mesfun <sup>2</sup>, Dilip Khatiwada <sup>1</sup>, Florian Kraxner <sup>2</sup>, Semida Silveira <sup>1</sup>

<sup>1</sup> Energy and Climate Studies Unit, Department of Energy Technology, KTH Royal Institute of Technology, SE-100 44 Stockholm, Sweden; dilip.khatiwada@energy.kth.se (D.K.); semida.silveira@energy.kth.se (S.S.)

<sup>2</sup> International Institute for Applied Systems Analysis (IIASA), A-2361 Laxenburg, Austria; leduc@iiasa.ac.at (S.L.); mesfun@iiasa.ac.at (S.M.); kraxner@iiasa.ac.at (F.K.)

\* Correspondence: harahap@kth.se; Tel.: +46-8-790 74 31

Received: 17 December 2018; Accepted: 25 January 2019; Published: 29 January 2019

## Supplementary materials

| Source of raw material<br>(i.e.FFB)<br>(RM) | Processing<br>plant<br>(P) | Intermediate<br>products<br>(IP) | Biomass processing<br>technologies<br>(Tech) | Bio-product<br>(BP)           | Demand<br>(D)           |
|---------------------------------------------|----------------------------|----------------------------------|----------------------------------------------|-------------------------------|-------------------------|
| 1 Small-scale plantations                   | 1 Palm oil mill            | 1 CPO                            | 1 CPO - CPO (eff. = 1)<br>(IP 1)             | 1 CPO<br>(Tech 1)             | 1 Palm oil demand*      |
| 2 Large-scale plantations                   |                            | 2 PK                             | 2 PK - PK (eff. = 1)<br>(IP 2)               | 2 PK<br>(Tech 2)              | 2 Regional power demand |
|                                             |                            | 3 PKS                            | 3 PKS - PKS (eff. = 1)<br>(IP 3)             | 3 PKS<br>(Tech 3)             |                         |
|                                             |                            | 4 PMF                            | 4 PMF - PMF (eff. = 1)<br>(IP 4)             | 4 PMF<br>(Tech 4)             |                         |
|                                             |                            | 5 EFB                            | 5 EFB - EFB (eff. = 1)<br>(IP 5)             | 5 EFB<br>(Tech 5)             |                         |
|                                             |                            | 6 POME                           | 6 Composting<br>(IP 5,6)                     | 6 Biofertiliser<br>(Tech 6)   |                         |
|                                             |                            |                                  | 7 Anaerobic digestion, 1 MW<br>(IP 6)        | 7 Power<br>(Tech 7,8,9,10,11) |                         |
|                                             |                            |                                  | 8 Anaerobic digestion, 2 MW<br>(IP 6)        |                               |                         |
|                                             |                            |                                  | 9 Low efficient CHP, 1 MW<br>(IP 3,4)        |                               |                         |
|                                             |                            |                                  | 10 High efficient CHP, 4 MW<br>(IP 3,4,5)    |                               |                         |
|                                             |                            |                                  | 11 High efficient CHP, 9 MW<br>(IP 3,4,5)    |                               |                         |

**Figure S1.** List of raw materials, intermediate products (IP), technologies (Tech), bio-products (BP) and associated demands optimized in the BeWhere model. Notes: Abbreviations: CHP (combined heat and power), CPO (crude palm oil), EFB (empty fruit bunch), FFB (fresh fruit bunch), PK (palm kernel), PKS (palm kernel shell), PMF (palm mesocarp fiber), POME (palm oil mill effluent). \* For the purpose of this analysis, demand of palm oil is defined as the CPO production capacity of the palm oil mill.

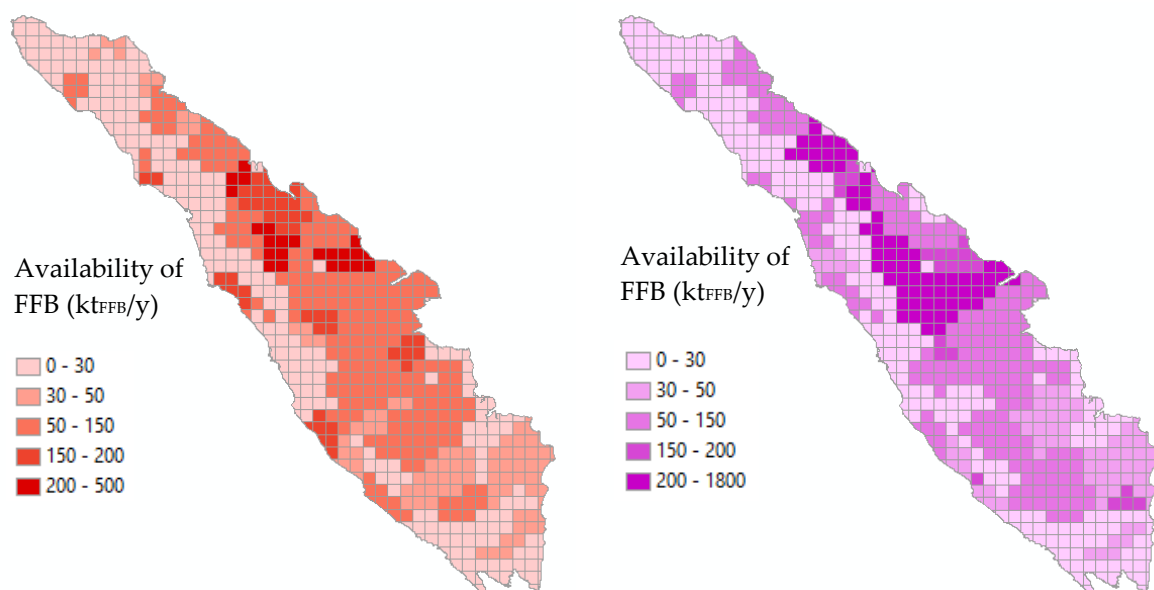

**Figure S2.** Representation of FFB availability in Sumatra, grid of  $25\text{ km} \times 25\text{ km}$  (left: small-scale plantations, right: large-scale plantations). Source: FFB availability in each district is quantified based on mature plantation area and average plantation yield [1].

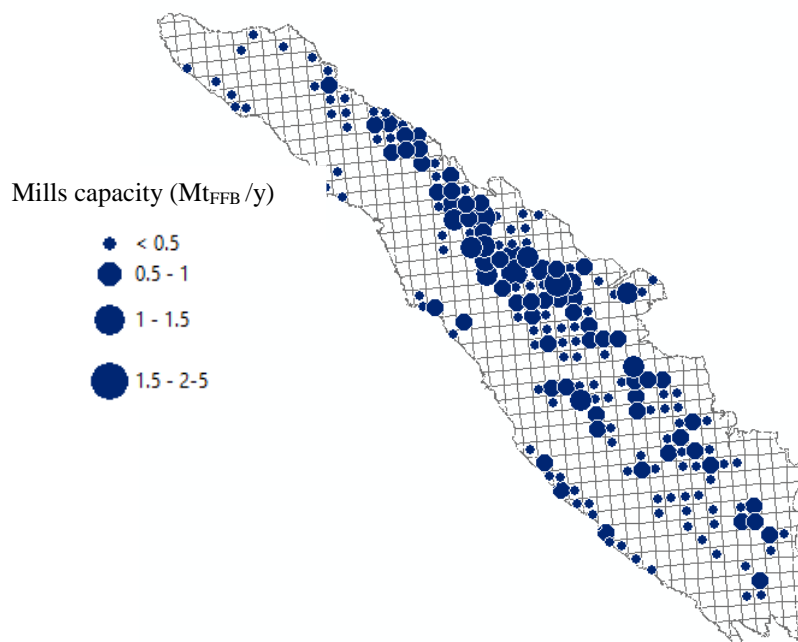

**Figure S3.** Mills capacity in grid of  $25\text{ km} \times 25\text{ km}$ .

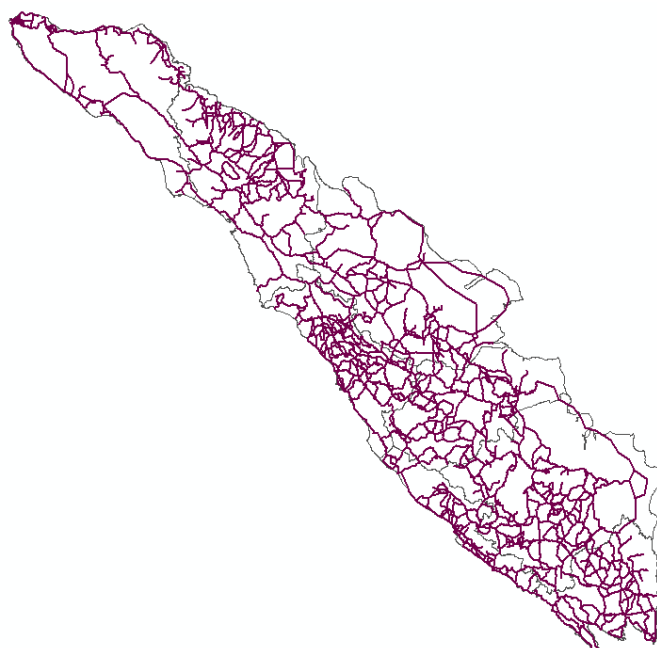

**Figure S4.** The road network of Sumatra. Source: Original data was obtained from Diva-GIS [2], road connection was improved by authors in ArcGis software.

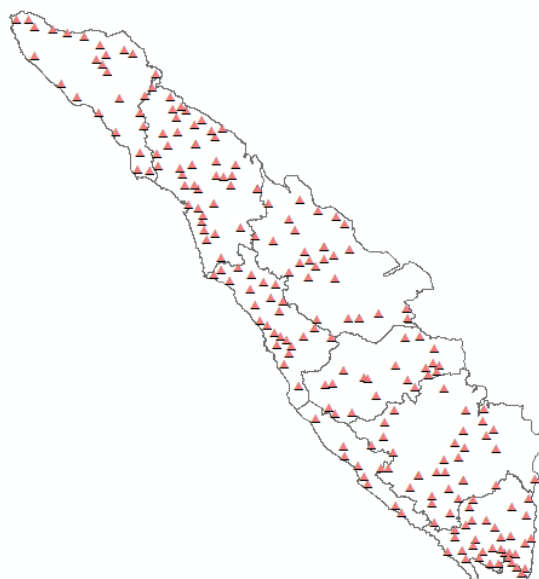

**Figure S5.** Geographical location of distribution transformers. Source: Original map was obtained from PLN [3] and georeferenced by authors.

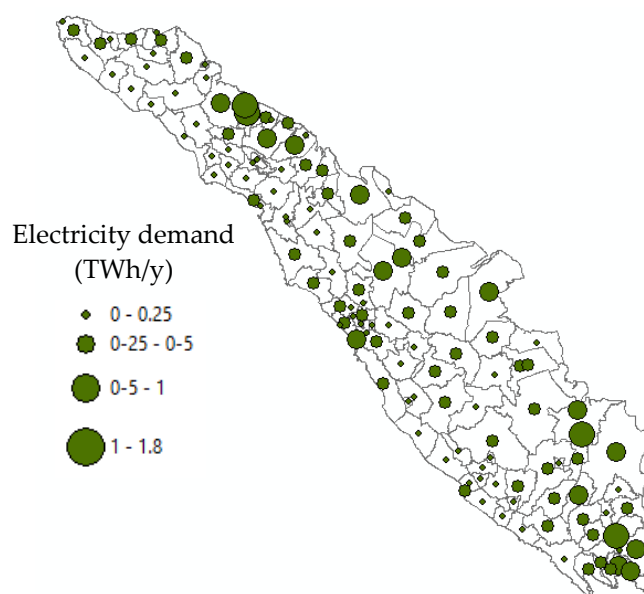

**Figure S6.** District's electricity demand. Source: The electricity demand per district is quantified based on population [4] and average electricity consumption per capita in Indonesia (812 kWh/y [5]). Total electricity demand in Sumatra considered in this study is 34 TWh/y.

**Table S1.** Conversion rate from FFB to intermediate products. (Values are expressed in  $t_{\text{product}}$  per  $t_{\text{FFB}}$ ).

| Intermediate Product         | Conversion Rate |
|------------------------------|-----------------|
| Crude palm oil, CPO          | 0.2             |
| Palm kernel, PK              | 0.047           |
| Palm kernel shell, PKS       | 0.06            |
| Palm mesocarp fiber, PMF     | 0.14            |
| Empty fruit bunch, EFB       | 0.23            |
| Palm oil mill effluent, POME | 0.022           |

Sources: All values were obtained from field work in 2016. Dry POME considers 4% dry content of POME [6].

**Table S2.** Technological conversion rate for processing the biomass residue into bio-products.

| Biomass Residue<br>(Intermediate Products) | Biomass Technology       | Bio-Products  | Unit                                           | Technological Conversion Rate |
|--------------------------------------------|--------------------------|---------------|------------------------------------------------|-------------------------------|
| Empty fruit bunch, EFB                     | Co-composting plant      | Biofertilizer | $t_{\text{biofertilizer}}/t_{\text{EFB}}$      | 0.32 [6]                      |
| Palm oil mill effluent, POME               | Co-composting plant      | Biofertilizer | $t_{\text{biofertilizer}}/t_{\text{dry-POME}}$ | 3.38 [6]                      |
| Palm oil mill effluent, POME               | Biogas plant             | Electricity   | MWh/ $t_{\text{dry-POME}}$                     | 2.40 [7]                      |
| Palm kernel shell, PKS                     | Low efficient CHP plant  | Electricity   | MWh/ $t_{\text{PKS}}$                          | 0.57 (*)                      |
| Palm mesocarp fiber, PMF                   | Low efficient CHP plant  | Electricity   | MWh/ $t_{\text{PMF}}$                          | 0.58 (*)                      |
| Palm kernel shell, PKS                     | High efficient CHP plant | Electricity   | MWh/ $t_{\text{PKS}}$                          | 1.37 (*)                      |
| Palm mesocarp fiber, PMF                   | High efficient CHP plant | Electricity   | MWh/ $t_{\text{PMF}}$                          | 1.39 (*)                      |
| Empty fruit bunch, EFB                     | High efficient CHP plant | Electricity   | MWh/ $t_{\text{EFB}}$                          | 1.19 (*)                      |

Notes: \* The technological conversion rate of the equipment producing electricity from solid biomass considers low heating values of 18.31 MJ/kg<sub>PKS</sub>, 18.49 MJ/kg<sub>PMF</sub>, 15.82 MJ/kg<sub>EFB</sub> [8]. Low efficient CHP plant was assumed to have electrical efficiency of 11%, while the high efficient CHP plant has electrical efficiency of 30%.

**Table S3.** Annualized cost of biomass-based technology.

| Biomass Technology                       | Bio-Products  | Unit                            | Annualized Technology Cost | O&M Cost |
|------------------------------------------|---------------|---------------------------------|----------------------------|----------|
| Co-composting plant                      | biofertilizer | USD/ $t_{\text{biofertilizer}}$ | 5.12 [6]                   | 0.26     |
| Biogas plant (anaerobic digestion), 1 MW | Electricity   | USD/MWh                         | 31.1 [9]                   | 1.56     |
| Biogas plant (anaerobic digestion), 2 MW | Electricity   | USD/MWh                         | 25.26 [9]                  | 1.26     |
| Low efficient CHP plant, 1 MW            | Electricity   | USD/MWh                         | 23.65 [10]                 | 1.18     |
| High efficient CHP plant, 4 MW           | Electricity   | USD/MWh                         | 36.12 [11]                 | 1.81     |
| High efficient CHP plant, 9 MW           | Electricity   | USD/MWh                         | 28.32 [11]                 | 1.42     |

Notes: The scaling effect of 0.7 [12] was used to adjust the costs of equipment from the reference value. Capacity factor of 80% is used to quantify the investment cost of biomass and biogas plants. O&M cost is 5% of the capital cost [13].

**Table S4.** Prices of bio-products used in the analysis.

| Bio-Product                     | Unit                           | Market Price            |
|---------------------------------|--------------------------------|-------------------------|
| Crude palm oil, CPO             | USD/t <sub>CPO</sub>           | 600 [14]                |
| Palm kernel, PK                 | USD/t <sub>PK</sub>            | 410 [15]                |
| Palm kernel shell, PKS          | USD/t <sub>PKS</sub>           | 69 [16]                 |
| Palm mesocarp fiber, PMF        | USD/t <sub>PMF</sub>           | 7 [16]                  |
| Empty fruit bunch, EFB          | USD/t <sub>EFB</sub>           | 7 [16]                  |
| Biofertilizer                   | USD/t <sub>Biofertilizer</sub> | 88 (*)                  |
| Electricity from biomass source | USD/MWh                        | 85 (Regulation 12/2017) |

Note: \* Calculated based on inorganic fertilizer price (NPK) [17] and considering nutrients value substitution of a tonne inorganic fertilizer equals to 7.9 dry tons of produced biofertilizer [18].

**Table S5.** Emissions factor applied in the model.

| Item                                                           | Emission Factor                                         |
|----------------------------------------------------------------|---------------------------------------------------------|
| Feedstock production for small-scale plantation <sup>(a)</sup> | 0.089 tCO <sub>2</sub> eq/t <sub>FFB</sub>              |
| Feedstock production for large-scale plantation <sup>(a)</sup> | 0.096 tCO <sub>2</sub> eq/t <sub>FFB</sub>              |
| Feedstock transport <sup>(b)</sup>                             | 90 tCO <sub>2</sub> eq/Mt <sub>FFB</sub> /km [19]       |
| Fossil diesel <sup>(c)</sup>                                   | 3.14 kgCO <sub>2</sub> eq/l <sub>diesel</sub> [20]      |
| Composting palm oil mill effluent                              | 0.01 tCO <sub>2</sub> eq/t <sub>POME</sub> [21]         |
| Bioelectricity production in biomass CHP plant <sup>(d)</sup>  | 7 kgCO <sub>2</sub> eq/MWh                              |
| Bioelectricity production in biogas plant <sup>(d)</sup>       | 0.91 kgCO <sub>2</sub> eq/MWh                           |
| Grid electricity emission factor of Sumatra                    | 0.855 tCO <sub>2</sub> eq/MWh [22]                      |
| Methane avoidance from POME treatment <sup>(e)</sup>           | 0.39 tCO <sub>2</sub> eq/m <sup>3</sup> <sub>POME</sub> |

Notes: (a) The emissions from activities required for producing FFB encompassed emissions from the use of nitrogen fertilizer in the plantation that emitted N<sub>2</sub>O. The amount of nitrogen fertilizer applied was calculated based on equation by Khasanah [23] for the relation between nitrogen fertilizer applied and the plantation yield in Indonesia:  $y = 1.1386x^2 - 28.157x + 265.36$ , where y is the amount of nitrogen fertilizer applied and x is plantation yield. Based on that equation the small and large-scale plantations consumed 92.94 kg/ha and 138.72 kg/ha of nitrogen fertilizer respectively, also shown in Table 1 of the main text. For the model input, the values of the fertilizer consumption were converted into 0.09 tCO<sub>2</sub>eq/t<sub>FFB</sub> for small-scale plantations and 0.1 tCO<sub>2</sub>eq/t<sub>FFB</sub> for large-scale plantations, considering conversion factors of 0.03 kgN<sub>2</sub>O/kgN<sub>fertilizer</sub> [24], conversion factor of N<sub>2</sub>O-N emissions to N<sub>2</sub>O emissions of 44/28, and GWP: 298. (b) The transportation emissions included the amount of FFB transported and the travel distance of a round trip between plantation and palm oil mill using heavy truck vehicle. (c) The emissions in palm oil mill included the use of diesel fuel for starting up daily operation (i.e., 0.768 l/t<sub>FFB</sub> [25]). (d) GHG emissions (i.e., CH<sub>4</sub> and N<sub>2</sub>O only) for electricity generation from stationary application is 0.109 kgCH<sub>4</sub>/MWh and 0.0143 kgN<sub>2</sub>O/MWh for biomass combustion, and 0.0109 kgCH<sub>4</sub>/MWh and 0.02 kgN<sub>2</sub>O/MWh for biogas combustion [26]. CO<sub>2</sub> emissions associated with biomass and biogas combustion were not accounted for since bioenergy is carbon-neutral along the biofuel chain. (e) The emissions factor of the methane avoidance from treating POME is calculated based on the UNFCCC methodology AMS-III.H.: Methane recovery in wastewater treatment [27]. The factors from Taylor et al. [7] are applied. Methane yield: 0.24 tCH<sub>4</sub>/tCOD, methane conversion factor: 0.8, lagoon Chemical Oxygen Demand (COD) efficiency: 0.96, POME to FFB ratio: 0.6 m<sup>3</sup>POME/t<sub>FFB</sub>, uncertainty factor: 0.9 and GWP: 25.

## References

1. Ministry of Agriculture. *Tree Crop Estate Statistics of Indonesia 2015–2017*; Ministry of Agriculture: Jakarta, Indonesia, 2017.
2. DIVA-GIS. GIS Data. Available online: <http://www.diva-gis.org/gdata>. (accessed on 7 September 2018).
3. PLN. *RUPTL PLN 2016–2025*; PLN: Jakarta, Indonesia, 2016.
4. BPS. BPS Database. Available online: <http://www.bps.go.id/> (accessed on 7 September 2018).
5. World Bank. Country Profile Indonesia: World Development Indicators, 2016. Available online: [http://databank.worldbank.org/data/Views/Reports/ReportWidgetCustom.aspx?Report\\_Name=CountryProfile&Id=b450fd57&tbar=y&dd=y&inf=n&zm=n&country=IDN](http://databank.worldbank.org/data/Views/Reports/ReportWidgetCustom.aspx?Report_Name=CountryProfile&Id=b450fd57&tbar=y&dd=y&inf=n&zm=n&country=IDN) (accessed on 9 February 2018).
6. UNFCCC. *PDD Co-Composting of EFB and POME—MG BioGreen Sdn.Bhd*; UNFCCC: Bonn, Germany, 2006.
7. Taylor, P.G.; Bilinski, T.M.; Fancher, H.R.F.; Cleveland, C.C.; Nemergut, D.R.; Weintraub, S.R.; Wieder, W.R.; Townsend, A.R. Palm oil wastewater methane emissions and bioenergy potential. *Nature Climate Change* **2014**, *4*, 151–152.
8. Fauzianto, R. Implementation of Bioenergy from Palm Oil Waste in Indonesia. *J. Sustain. Dev. Stud.* **2014**, *5*, 100–115.
9. Rahayu, A.S.; Karsiwulan, D.; Trisnawati, H.I.; Mulyasari, S.; Rahardjo, S.; Hokerman, S.; Paraminta, V. Handbook POME-to-Biogas Project Development in Indonesia. Available online: <https://www.winrock.org/wp-content/uploads/2016/05/CIRCLE-Handbook-2nd-Edition-EN-25-Aug-2015-MASTER-rev02-final-new02-edited.pdf> (accessed on 24 January 2019).
10. Arrieta, F.R.P.; Teixeira, F.N.; Yáñez, E.; Lora, E.; Castillo, E. Cogeneration potential in the Columbian palm oil industry: Three case studies. *Biomass Bioenergy*, **2007**, *31*, 503–511.
11. UNFCCC. *PDD Pelita Agung Cogeneration Plant*; UNFCCC: Bonn, Germany, 2008.
12. Khatiwada, D.; Leduc, S.; Silveira, S.; McCallum, I. Optimizing ethanol and bioelectricity production in sugarcane biorefineries in Brazil. *Renew. Energy* **2016**, *85*, 371–386.
13. Yoshizaki, T.; Shirai, Y.; Hassan, M. A.; Baharuddin, A. S.; Raja Abdullah, N. M.; Sulaiman, A.; Busu, Z. Improved economic viability of integrated biogas energy and compost production for sustainable palm oil mill management. *J. Clean. Prod.* **2013**, *44*, 1–7.
14. UNCTAD, UNCTAD Statistics. Available online: <http://unctadstat.unctad.org/EN/Index.html>. (accessed on: 12 March 2017).
15. KBP Nusantara, Trading Info CPO. Available: <http://www.kpbptpn.co.id/home-0.html> (accessed on: 12 March 2017).
16. Kasivisvanathan, H.; Ng, R.T.L.; Tay, D.H.S.; Ng, D.K.S. Fuzzy optimisation for retrofitting a palm oil mill into a sustainable palm oil-based integrated biorefinery. *Chem. Eng. J.* **2012**, *200*, 694–709.
17. Daftar Harga Pupuk Bersubsidi Dan Non Subsidi Tahun 2017. Available online: <http://belajartani.com/reportase-inilah-daftar-harga-pupuk-bersubsidi-dan-non-subsidi-tahun-2017/> (accessed on: 28 November 2017).
18. UNFCCC. *PDD Co-composting of POME Sludge and Empty Fruit Bunches*. UNFCCC: Bonn, Germany, 2008.
19. Lam, H.L.; Ng, W.P.Q.; Ng, R.T.L.; Ng, E.H.; Aziz, M.K.A.; Ng, D.K.S. Green strategy for sustainable waste-to-energy supply chain. *Energy* **2013**, *57*, 4–16.
20. International Sustainability and Carbon Certification (ISCC), ISCC 205 Greenhouse Gas Emissions Version 3.0. Available online: [https://www.iscc-system.org/wp-content/uploads/2017/02/ISCC\\_205\\_GHG\\_Emissions\\_3.0.pdf](https://www.iscc-system.org/wp-content/uploads/2017/02/ISCC_205_GHG_Emissions_3.0.pdf) (accessed on: 25 November 2018).
21. Sinar Mas, Methane Avoidance Co-Composting Project. Available online: [https://www.iscc-system.org/wp-content/uploads/2017/05/Pasang\\_GAR\\_SMART\\_TC\\_SEA\\_Jakarta\\_120815.pdf](https://www.iscc-system.org/wp-content/uploads/2017/05/Pasang_GAR_SMART_TC_SEA_Jakarta_120815.pdf) (accessed on 8 September 2018).
22. Institute for Global Environmental Strategies (IGES). List of Grid Emission Factors, version 10.3, 2018. Available online: <https://pub.iges.or.jp/pub/iges-list-grid-emission-factors> (accessed on 25 November 2018).
23. Khasanah, N.; van Noordwijk, M.; Ekadinata, A.; Dewi, S.; Rahayu, S.; Ningsih, H.; Setiawan, A.; Dwiyantri, E.; Octaviani, R. The carbon footprint of Indonesian palm oil production. Available online: <http://old.icraf.org/sea/Publications/files/policybrief/PB0047-12.pdf> (accessed on 24 January 2019).
24. Cho, H. J.; Kim, J.-K.; Ahmed, F.; Yeo, Y.-K. Life-cycle greenhouse gas emissions and energy balances of a biodiesel production from palm fatty acid distillate (PFAD). *Applied Energy* **2013**, *111*, 479–488.
25. Soraya, D. F.; Gheewala, S. H.; Bonnet, S.; Tongurai, C. Life Cycle Assessment of Biodiesel Production from

- Palm Oil and Jatropha Oil in Indonesia. *Journal of Sustainable Energy & Environment*, **2014**, 5, 27–32.
26. USEPA. *EPA Climate Leadership—Emission Factors November 2015*; USEPA: Washington, DC, USA, 2015.
27. UNFCCC. *Methodology for methane recovery in waste water treatment*; UNFCCC: Bonn, Germany, 2014.
